# Supplementary material for: Deciphering Short-Range Order Driven Mechanical Enhancement in CrTaTiMo Refractory Alloys via Machine-learning Potential and Experimental Validation
Source: Research Square preprint supplement (doi:10.21203/rs.3.rs-7171969/v1), 2025-07-30
Supplement: Supplementary file 1 [file 933eb4f3116c4b49a2b0e049.xlsx]

## Sheet: Sheet1
Structure & System	Iteration	Length (ps)	Accurate (%)	Candidate (%)	Failed (%)	Added data	Criteria for maximum force error [lo, hi]
1. Low T (LT). RMEA (128 atoms). NpT.	Iter.00	1	80.7	19.4	0	180	[0.05, 0.20]
	Iter.01	3	85.5	14.5	0	180
	Iter.02	6	88.5	11.6	0	180
	Iter.03	12	90.8	9.2	0.1	180
	Iter.04	25	99.95	0.05	0	0	[0.10, 0.25]
	Total					720
2. LT. RMEA, MCMD. NpT.	Iter.05	1	2	31.7	66.3	180
	Iter.06	3	30.9	65.4	3.8	180
	Iter.07	6	99.2	0.8	0	34
	Total					394
3. LT. RMEA, Tensile MD (3%, 8%, 15%). NpT.	Iter.08	3	98.1	1.9	0	60
	Iter.09	8	98.5	1.5	0	60
	Iter.10	15	83.6	15.9	0.5	141
	Iter.11	15	96.7	3.3	0	142
	Iter.12	15	98.6	1.5	0	151
	Iter.13	15	98.5	1.5	0	109
	Iter.14	15	99.3	0.7	0	11	[0.12, 0.25]
	Total					674
4. LT. Pure element. Cr, Mo, Ta, bcc (128, respectively); Ti_hcp (96). NpT.	Iter.15	1	4.1	51.9	44.1	240
	Iter.16	3	83.1	14.1	17.7	125
	Iter.17	6	95.2	4.8	0	100
	Iter.18	12	100	0	0	0
	Total					465
6. LT. Cr2Ta. C14 (48) & C15 (24). NpT.	Iter.23	1	54.8	45.2	0.1	200
	Iter.24	3	94.3	5.7	0.1	148
	Iter.25	6	99.9	0	0	0
	Iter.26	12	100	0	0	0
	Iter.27	25	100	0	0	0
	Total					348
7. Medium T (MT). RMEA. NpT.	Iter.28	1	37.9	47.5	14.6	300	[0.15, 0.30]
	Iter.29	3	29.9	60.6	7.1	227
	Iter.30	6	73.6	25.4	1	229
	Iter.31	12	80.2	19.5	0.3	237
	Iter.32	25	82.7	18.9	0.2	236
	Iter.33	40	89.1	10.8	0.1	239
	Iter.34	60	88.6	11.4	0.1	234
	Iter.35	80	2.2	74.7	24.7	240	[0.20, 0.35]
	Iter.36	100	99.1	0.9	0	0
	Iter.37	120	99.6	0.4	0	0
	Total					1942
8. MT. RMEA, MCMD. NpT.	Iter.38	1	99.3	0.7	0	33
	Iter.39	3	99.3	0.7	0	0
	Iter.40	6	99.3	0.7	0	0
	Iter.41	12	99.1	0.9	0	16
	Total					49
9. MT. Pure element, Cr2Ta. Cr, Mo, Ta, Ti (128), bcc; Ti_hcp. Cr2Ta, C14&C15. NpT.	Iter.42	0.5	93.3	6.2	0.5	380
	Iter.43	1	91.3	8.4	0.2	280
	Iter.44	3	99.8	0.2	0	0
	Iter.45	6	99.8	0.2	0	0
	Iter.46	12	99.8	0.2	0	0
	Iter.47	25	99.8	0.2	0	0
	Total					660
10. High T (HT). RMEA. NpT.	Iter.48	1	60.5	30.6	8.9	240
	Iter.49	3	63.7	30.8	5.5	240
	Iter.50	6	79.9	18.4	1.7	240
	Iter.51	12	88.2	11.1	0.8	240
	Iter.52	25	94.3	5.3	0.3	240
	Iter.53	40	96	3.9	0.1	190
	Iter.54	60	97.6	2.4	0.1	107
	Iter.55	80	97.2	3.8	0.1	138
	Iter.56	100	97.9	2	0.1	111
	Iter.57	120	99.3	0.7	0	0	[0.23,0.38]
	Total					1746
11. HT, RMEA, MCMD, NpT.	Iter.58	1	99.4	0.6	0	19
	Iter.59	3	99.3	0.7	0	18
	Iter.60	6	99.1	0.8	0	34
	Iter.61	12	99.2	0.8	0	23
	Iter.62	25	99.5	0.5	0	0
	Total					94
12. HT. Pure element, Cr2Ta. Cr, Mo, Ta, Ti, bcc; Ti_hcp. Cr2Ta, C14&C15. NpT.	Iter.63	1	96.87	1.78	0.23	160
	Iter.64	3	98.77	0.7	0.09	92
	Iter.65	6	99.22	0.42	0.08	32
	Iter.66	12	98.78	0.73	0.06	80
	Iter.67	25	99.41	0.37	0.01	42
	Iter.68	40	99.47	0.32	0.02	21
	Iter.69	60	99.51	0.29	0.03	0
	Total					427
13. LT. RMEA, NVT.	Iter.70	1	89.4	10.6	0	36	[0.10, 0.25]
	Iter.71	3	92.52	5.37	0	35
	Iter.72	6	96.62	3.38	0	0
	Iter.73	12	96.51	3.49	0	29
	Iter.74	25	97.49	2.51	0	0
	Iter.75	40	98.4	1.6	0	0
	Iter.76	60	98.33	1.67	0	0
	Iter.77	80	100	0	0	0	[0.12, 0.25]
	Total					100
14. LT. Cr, Mo, Ta, Ti, bcc; Ti_hcp. Cr2Ta, C14&C15. NVT.	Iter.78	1	100	0	0	0
	Iter.79	6	100	0	0	0
	Iter.80	25	100	0	0	0
	Total					0
2*. LT. RMEA, MCMD. NpT.	Iter.81	1	98.87	1.13	0	62	[0.10, 0.25]
	Iter.82	3	97.73	2.27	0	125
	Iter.83	6	89.41	10.59	0	233
	Iter.84	12	99.18	0.82	0	32
	Iter.85	25	99.05	0.95	0	48
	Iter.86	40	93.22	6.78	0	225
	Iter.87	60	99.96	0.04	0	0
	Iter.88	80	99.93	0.07	0	0
	Iter.89	80	99.89	0.11	0	0
	Total					725
